# Supplementary material for: Oncolytic Vaccinia Virus Disrupts Tumor-Associated Vasculature in Humans
Source: Oxford University Press journal article supplement (doi:10.1158/0008-5472.can-12-2687), 2013-02-08
Supplement: 00085472can122687-sup-supplementary_figure_4_pdf_file_-_69k.pdf [file 00085472can122687-sup-supplementary_figure_4_pdf_file_-_69k.pdf]

### Supplementary Figure 4

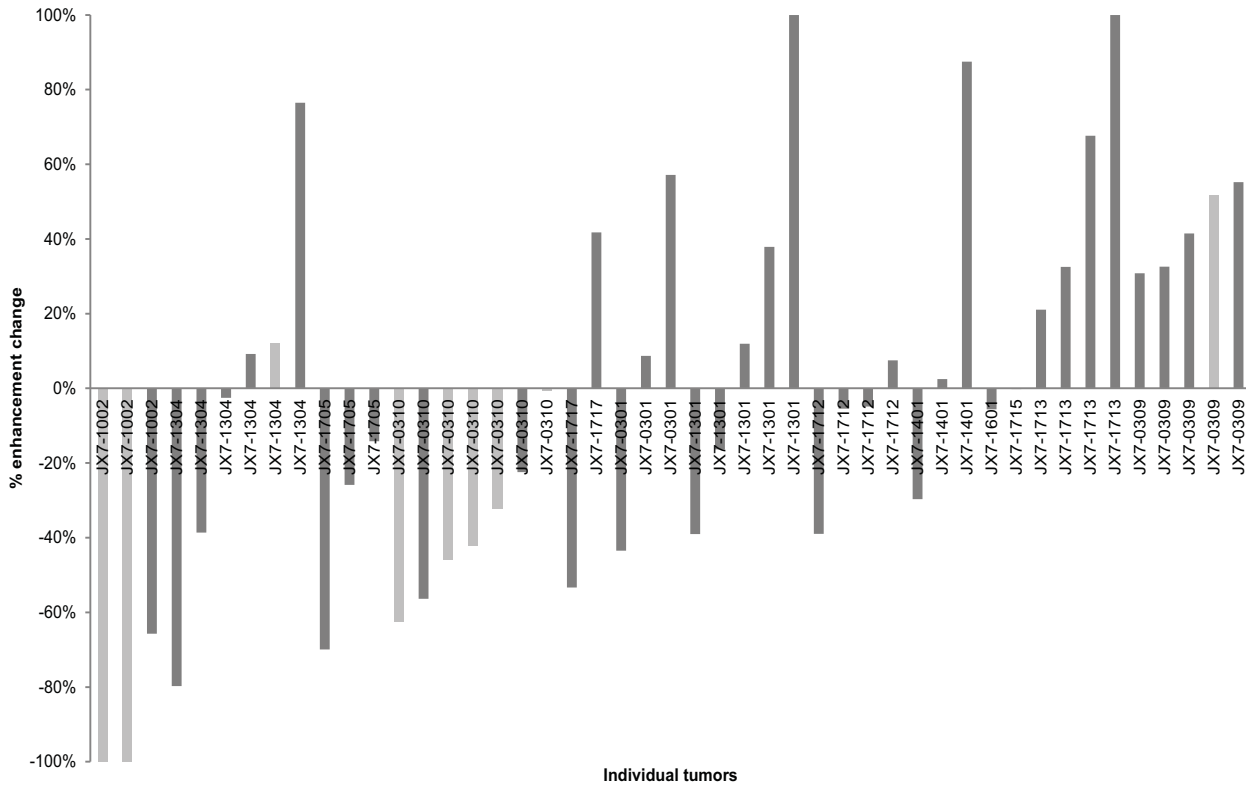

Supplementary Figure 4. Waterfall plot showing percent decrease in tumor enhancement (perfusion) from baseline to Day 5 (dark grey – injected tumors; light grey – non-injected tumors).
