# Supplementary material for: Oncolytic Vaccinia Virus Disrupts Tumor-Associated Vasculature in Humans
Source: Oxford University Press journal article supplement (doi:10.1158/0008-5472.can-12-2687), 2013-02-08
Supplement: 00085472can122687-sup-supplementary_table_1_pdf_file_-_30k.pdf [file 00085472can122687-sup-supplementary_table_1_pdf_file_-_30k.pdf]

**Supplementary Table 1- Rabbit GLP toxicology study of intravenous JX-594.**

New Zealand white rabbits (n=10 rabbits per dose group per timepoint; n=90 total) were injected with intravenous (IV) vehicle or JX-594 once or weekly for three consecutive weeks at doses of  $3 \times 10^6$  -  $3 \times 10^7$  pfu/kg/dose. Blood samples and organs were obtained and analyzed at baseline and on Days 3, 7, 14, 21 and 44.

| Organ histopathology         | abnormalities* (y/n) | vascular pathology (y/n) | bleeding evidence (y/n) |
|------------------------------|----------------------|--------------------------|-------------------------|
| adrenal gland                | N                    | N                        | N                       |
| aorta                        | N                    | N                        | N                       |
| brain                        | N                    | N                        | N                       |
| colon                        | N                    | N                        | N                       |
| duodenum                     | N                    | N                        | N                       |
| esophagus                    | N                    | N                        | N                       |
| eye                          | N                    | N                        | N                       |
| heart                        | N                    | N                        | N                       |
| ileum                        | N                    | N                        | N                       |
| kidney                       | N                    | N                        | N                       |
| liver                        | N                    | N                        | N                       |
| lung (bronchi)               | N                    | N                        | N                       |
| lymph nodes                  | N                    | N                        | N                       |
| mammary gland                | N                    | N                        | N                       |
| muscle                       | N                    | N                        | N                       |
| pancreas                     | N                    | N                        | N                       |
| spleen                       | Y <sup>ψ</sup>       | N                        | N                       |
| stomach                      | N                    | N                        | N                       |
| Blood analysis (lab values)  | abnormalities* (y/n) |                          |                         |
| coagulation (PT/INR)         | N                    | n.a.                     | n.a.                    |
| clotting (platelets)         | N                    | n.a.                     | n.a.                    |
| kidney function (creatinine) | N                    | n.a.                     | n.a.                    |

\*if 1) histopathology deemed clinically-significant and significantly different vs control (vehicle-treated) group or 2) if outside of normal laboratory limits; histopathology and blood tests assessed Days 3, 7, 14, 21 and 44; n.a., not applicable

<sup>ψ</sup> mild lymphoid hyperplasia, consistent with anti-viral response

PT, prothrombin time
